# Supplementary material for: “Stable-on-the-Table” Biosensors: Hemoglobin-Poly (Acrylic Acid) Nanogel BioElectrodes with High Thermal Stability and Enhanced Electroactivity
Source: PubMed Central journal article supplement (PMC4610568; doi:10.3390/s150923868), 2015-09-18
Supplement: sensors-15-23868-s001.pdf [file sensors-15-23868-s001.pdf]

Supplementary Information

## **“Stable-on-the-Table” Biosensors: Hemoglobin-Poly (Acrylic Acid) Nanogel BioElectrodes with High Thermal Stability and Enhanced Electroactivity. *Sensors* 2015, 15, 23868-23885**

**Ananta Ghimire<sup>1</sup>, Omkar V. Zore<sup>1</sup>, Vindya K. Thilakarathne<sup>1</sup>, Victoria A. Briand<sup>1</sup>, Patrick J. Lenehan<sup>3</sup>, Yu Lei<sup>4</sup>, Rajeswari M. Kasi<sup>1,2,\*</sup> and Challa V. Kumar<sup>1,2,3,\*</sup>**

<sup>1</sup> Department of Chemistry, University of Connecticut, Storrs, CT 06269, USA; E-Mails: ananta.ghimire@uconn.edu (A.G.); omkar.zore@uconn.edu (O.V.Z.); vindyakalani@gmail.com (V.K.T.); victoria.briand@gmail.com (V.A.B.);

<sup>2</sup> Institute of Materials Science, U-3136, University of Connecticut, Storrs, CT 06269, USA;

<sup>3</sup> Department of Molecular and Cell Biology, University of Connecticut Storrs, Storrs, CT 06269, USA; E-Mail: patrick.lenehan@uconn.edu

<sup>4</sup> Department of Chemical and Biomolecular Engineering, University of Connecticut, Storrs, CT 06269, USA; E-Mail: ylel@engr.uconn.edu

\* Authors to whom correspondence should be addressed; E-Mails: kasi@uconn.edu (R.M.K.); challa.kumar@uconn.edu (C.V.K.); Tel.: +1-860-486-3213 (C.V.K.); Fax: +1-860-486-2981 (C.V.K.).

---

### **Transmission Electron Microscopy (TEM)**

Transmission electron microscopy (TEM) was used to determine the morphology of the Hb-PAA conjugates, Hb and crosslinked Hb-PAA conjugates. Tecnai T12 instrument operating at an accelerating voltage of 120 kV was used to obtain TEM images. Hb concentration was 0.026 mg/mL and PAA concentration was 0.007 mg/mL in the samples that were used for TEM experiment. A drop of each sample solution was deposited on a copper grid covered with Formvar film. Excess solution was blotted away with a piece of filter paper to leave a thin layer of solution on the grid. The sample was left to dry in air, and then stained with Uranyl acetate for 30 min prior to taking images.

**Table S1.** Synthesis conditions of small library of Hb-PAA conjugates.

| <i>Molar Ratio = 1 Hb/0.3 PAA</i> |             |          |                    |
|-----------------------------------|-------------|----------|--------------------|
| Entry                             | PAA (mg/mL) | EDC/COOH | State <sup>a</sup> |
| 0A                                | 2.6         | 0.46     | L                  |
| 0F                                | 2.6         | 1.5      | L                  |
| 1A                                | 10          | 0.46     | TL                 |
| 2A                                | 20          | 0.46     | G                  |
| <i>Molar Ratio = 1 Hb/0.8 PAA</i> |             |          |                    |
| Entry                             | PAA (mg/mL) | EDC/COOH | State <sup>a</sup> |
| 0G                                | 1.5         | 1.5      | L                  |
| 0B                                | 2.6         | 0.13     | L                  |
| 0C                                | 2.6         | 0.46     | L                  |
| 0D                                | 2.6         | 1.5      | L                  |
| 1B                                | 10          | .13      | TL                 |
| 1C                                | 10          | 0.46     | G                  |
| 1D                                | 10          | 1.5      | G                  |
| 2B                                | 20          | 0.13     | TL                 |
| 2C                                | 20          | 0.46     | HG                 |
| 2D                                | 20          | 1.5      | HG                 |
| <i>Molar Ratio = 1 Hb/3 PAA</i>   |             |          |                    |
| Entry                             | PAA (mg/mL) | EDC/COOH | State <sup>a</sup> |
| 0E                                | 2.6         | 0.46     | L                  |
| 1E                                | 10          | 0.46     | TL                 |
| 2E                                | 20          | 0.46     | HG                 |
| 3E                                | 30          | 0.46     | HG                 |

<sup>a</sup> L = liquid, TL = thickened liquid, G = homogeneous gel, HG = heterogeneous gel.

**Table S2.** Synthetic conditions used to make Hb-PAA conjugates.

| Sample                   | Hb:PAA (Mole Ratio) | Hb:PAA (Mass Ratio) | EDC:COOH |
|--------------------------|---------------------|---------------------|----------|
| Hb-PAA-450k(1:0.3:0.5) * | 1 Hb:0.3 PAA        | 1 Hb:2.1 PAA        | 0.5      |
| Hb-PAA-450k(1:0.3:1.5)   | 1 Hb:0.3 PAA        | 1 Hb:2.1 PAA        | 1.5      |
| Hb-PAA-450k(1:0.8:1.5)   | 1 Hb:0.8 PAA        | 1 Hb:5.5 PAA        | 1.5      |

\* Hb-PAA450k(1:0.3:0.5) synthesis and characterization was reported previously [1].

**Table S3.** Sizes of conjugates from DLS studies.

| Sample                      | Size          |
|-----------------------------|---------------|
| Hb-PAA-450k(1:0.8:1.5)      | 84.8 nm (94%) |
| Hb-PAA-450k(1:0.3:1.5)      | 62.6 nm (92%) |
| Hb-PAA-450k(1:0.8:1.5)-PEI  | 59.4 nm (84%) |
| Hb-PAA-450k(1:0.8:1.5)-TEPA | 68.2 nm (82%) |

**Table S4.** Specific activities of Hb, Hb-PAA-450k(1:0.8:1.5) and Hb-PAA-450k(1:0.3:1.5) at increasing guaiacol concentrations.

| Guaiacol Concentration | Specific Activity $\times 10^{-3} (\text{M}^{-1})$ |                        |                        |
|------------------------|----------------------------------------------------|------------------------|------------------------|
|                        | Hb                                                 | Hb-PAA-450k(1:0.8:1.5) | Hb-PAA-450k(1:0.3:1.5) |
| 0.5 mM                 | 0.525 $\pm$ 0.023                                  | 1.066 $\pm$ 0.034      | 1.140 $\pm$ 0.054      |
| 0.75 mM                | 0.638 $\pm$ 0.029                                  | 1.112 $\pm$ 0.044      | 1.179 $\pm$ 0.106      |
| 1 mM                   | 0.743 $\pm$ 0.037                                  | 1.439 $\pm$ 0.031      | 1.259 $\pm$ 0.085      |
| 2.5 mM                 | 1.005 $\pm$ 0.053                                  | 1.204 $\pm$ 0.029      | 1.434 $\pm$ 0.075      |
| 4 mM                   | 1.118 $\pm$ 0.057                                  | 1.245 $\pm$ 0.090      | 1.375 $\pm$ 0.149      |

**Table S5.** Synthetic conditions used to make Hb-PAA-450K(1:0.8:1.5)-amine conjugates. Purified Hb-PAA-450K(1:0.8:1.5) sample were subjected to following synthetic condition to achieve Hb-PAA-450K(1:0.8:1.5)-TEPA and Hb-PAA-450K(1:0.8:1.5)-PEI conjugates. Only 0.2% of total COOH on Hb-PAA-450K(1:0.8:1.5) were modified with the amine.

| Sample                      | NH <sub>2</sub> :COOH | EDC:COOH |
|-----------------------------|-----------------------|----------|
| Hb-PAA-450k(1:0.8:1.5)-TEPA | 0.002                 | 0.004    |
| Hb-PAA-450k(1:0.8:1.5)-PEI  | 0.002                 | 0.004    |

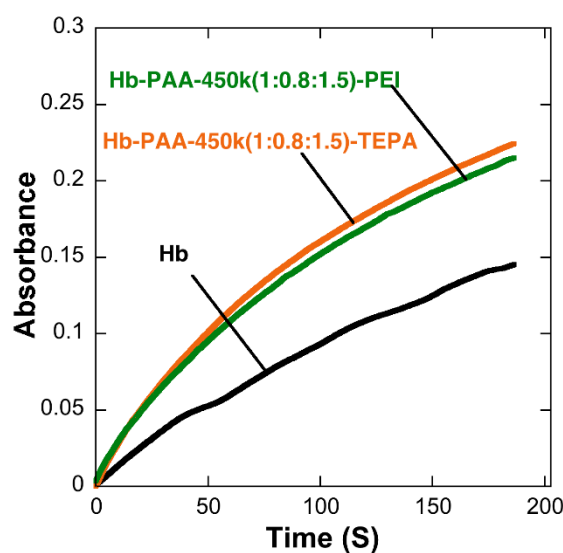

**Figure S1.** Comparison of kinetic traces of Hb, Hb-PAA-450k(1:0.8:1.5)-TEPA and Hb-PAA-450k(1:0.8:1.5)-PEI. Hb concentration was kept at 1  $\mu\text{M}$  and the H<sub>2</sub>O<sub>2</sub> and guaiacol concentrations were 1 and 2.5 mM, respectively. All activity traces were collected at room temperature in phosphate buffer pH 7.4. Each kinetic trace is an average of 4 trials. Initial rates of all samples were extracted from above kinetic traces and corrected for protein concentration to obtain specific activity values.

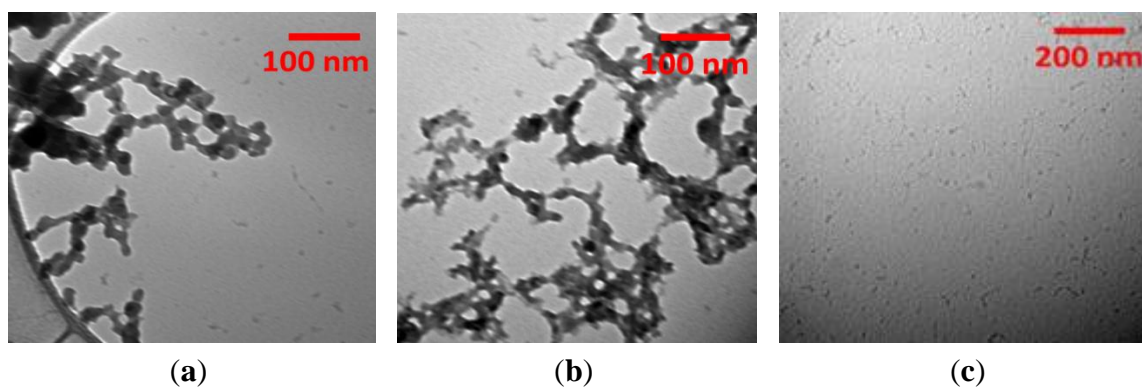

**Figure S2.** (a) Hb-PAA-450k(1:0.8:1.5)-TEPA; (b) Hb-PAA-450k(1:0.8:1.5)-PEI and (c) Hb-PAA-450k(1:0.3:1.5) in phosphate buffer pH 7.4, after staining with uranyl acetate. Samples that are crosslinked with polyamines show extensive network structure in TEM micrographs.

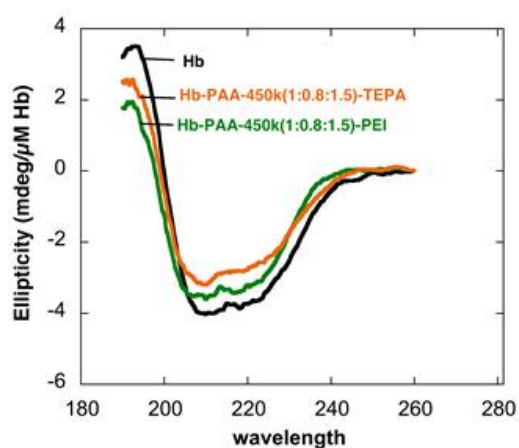

**Figure S3.** Far UV CD spectra of Hb, Hb-PAA-450k(1:0.8:1.5)-PEI(green) and Hb-PAA-450k(1:0.8:1.5)-TEPA(orange). All the spectra were corrected for Hb concentration and samples were in 10 mM phosphate buffer pH 7.4.

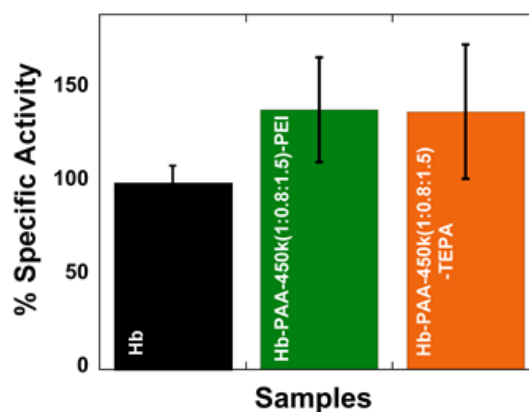

**Figure S4.** Specific activities (compared to Hb, 100%) of Hb-PAA-450k(1:0.8:1.5)-PEI, Hb-PAA-450k(1:0.8:1.5)-TEPA at room temperature. Hb concentration was 1  $\mu$ M and the  $H_2O_2$  and guaiacol concentrations were 1 mM and 2.5 mM, respectively. All activity traces were collected at room temperature in phosphate buffer pH 7.4.

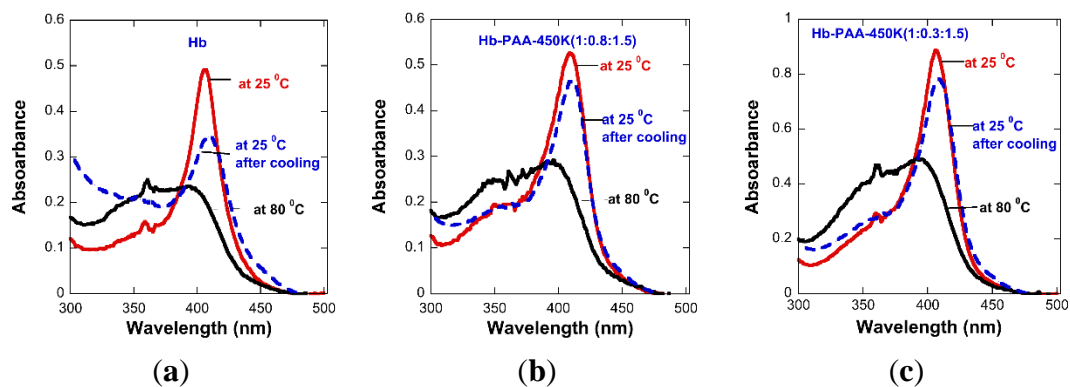

**Figure S5.** Absorbance spectra of Hb (a), Hb-PAA-450k(1:0.8:1.5) (b) and Hb-PAA-450k(1:0.3:1.5) (c) at room temperature (red line), heated at 80 °C (black line) and cooled for 24 h (blue dash line) at room temperature. All the spectra were corrected for Hb concentration and samples were in 10 mM phosphate buffer pH 7.4.

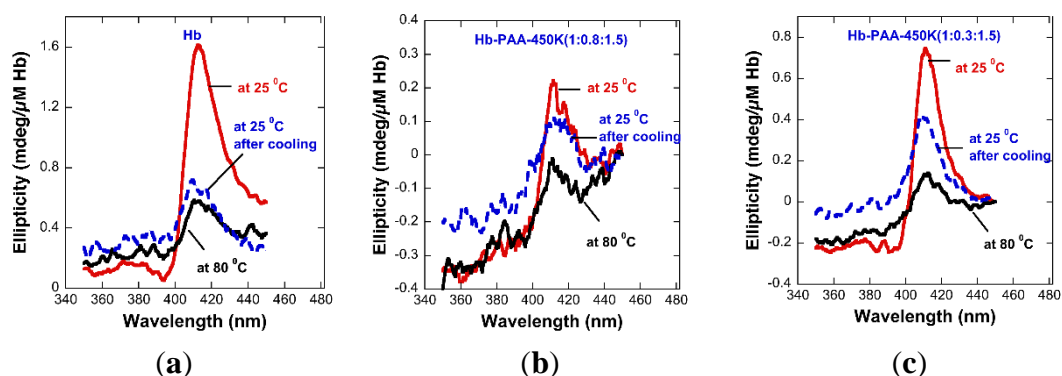

**Figure S6** Soret circular dichroism spectra of Hb (a), Hb-PAA-450k(1:0.8:1.5) (b) and Hb-PAA-450k(1:0.3:1.5), (c) at room temperature (red line), heated at 80 °C (black line) and cooled for 24 h (blue dashed line) at room temperature. All spectra were normalized with respect to protein concentration and path length (10 mM phosphate buffer pH 7.4).

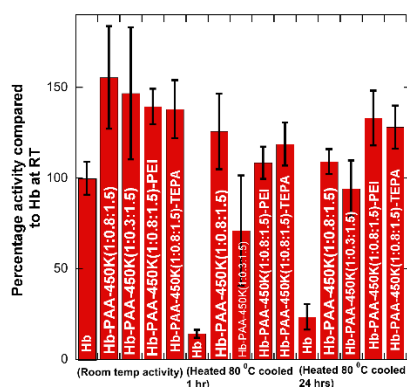

**Figure S7.** Specific activities (compared to Hb as 100%) of Hb-PAA-450k(1:0.8:1.5), Hb-PAA-450k(1:0.3:1.5), Hb-PAA-450K(1:0.8:1.5)-PEI and Hb-PAA-450k(1:0.8:1.5)-TEPA at room temperature, after heating to 80 °C and cooling for 1 h, and 24 h. Hb concentration was 1 μM and the H<sub>2</sub>O<sub>2</sub> and guaiacol concentrations were 1 and 2.5 mM, respectively. All activity traces were collected at room temperature in phosphate buffer, pH 7.4.

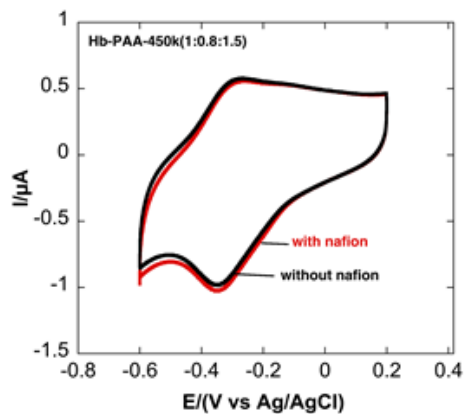

**Figure S8.** Cyclic voltammograms of Hb-PAA-450k(1:0.8:1.5) with and without nafion immersed in 0.1 M PBS pH 7.4 after 30 min.

## References

1. Thilakarathne, V.; Briand, V.A.; Zhou, Y.; Kasi, R.M.; Kumar, C.V. Protein Polymer Conjugates: Improving the Stability of Hemoglobin with Poly(acrylic acid). *Langmuir* **2011**, *27*, 7663–7671.

© 2015 by the authors; licensee MDPI, Basel, Switzerland. This article is an open access article distributed under the terms and conditions of the Creative Commons Attribution license (<http://creativecommons.org/licenses/by/4.0/>).
